# Supplementary material for: Deviation of phase transition process in surface-tethered thermotropic liquid crystalline polymer nanocomposites with graphene oxide: a spectroscopic study
Source: Royal Society of Chemistry journal article supplement (doi:10.1039/c3py00764b), 2013-01-01
Supplement: c3py00764b.pdf [file c3py00764b.pdf]

# Deviation of Phase Transition Process in Surface-tethered Thermotropic Liquid Crystalline Polymer Nanocomposites with Graphene Oxide: A Spectroscopic Study

Ying Jing, Hui Tang\* and Peiyi Wu\*

## 1. TGA result of GO-PMPCS composite

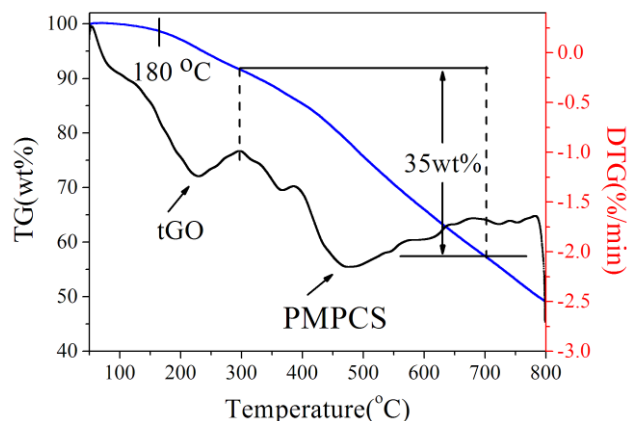

Fig. S1. TGA result of GO-PMPCS composite

## 2. 2D correlation analysis of PMPCS/GO-PMPCS system in 100~140 °C

Table S1. Symbols of the cross-peaks in synchronous and asynchronous spectra of the three representative spectral regions of PMPCS/GO-PMPCS system in 100~140 °C

| Cross-peak                  | Variation order | Cross-peak      | Variation order |
|-----------------------------|-----------------|-----------------|-----------------|
| 2958/2910(+,-) <sup>a</sup> | 2910→2958       | 2910/2875 (+,+) | 2910→2875       |
| 3004/2910(+,+)              | 3004→2910       | 2958/2875 (+,+) | 2958→2875       |
| 3032/2910(-,-)              | 3032→2910       | 3080/2875 (+,+) | 3080→2875       |
| 3080/2910(+,+)              | 3080→2910       | 2935/2875 (+,0) | 2935,2875       |
| 3004/2958(+,+)              | 3004→2958       | 2935/2835 (+,-) | 2835→2935       |
| 3032/2958(-,-)              | 3032→2958       | 2958/2935 (+,+) | 2958→2935       |
| 3080/2958(+,+)              | 3080→2958       | 2935/2910 (+,-) | 2910→2935       |
| 3004/2875(+,+)              | 3004→2875       | 3080/3032(-,+)  | 3032→3080       |
| 3032/2875(-,-)              | 3032→2875       | 3080/3004(+,0)  | 3080,3004       |
| 2910/1508(+,-)              | 1508→2910       | 2910/1498(-,+)  | 1498→2910       |
| 2958/1508(+,-)              | 1508→2958       | 3004/1498(-,+)  | 1498→3004       |
| 3032/1508(-,+)              | 1508→3032       | 3032/1498(+,+)  | 3032→1498       |
| 1732/1508(+,-)              | 1508→1732       | 2958/1732(+,-)  | 1732→2958       |
| 1732/1498(-,+)              | 1498→1732       | 2935/1732(+,-)  | 1732→2935       |
| 2910/1732(+,-)              | 1732→2910       | 3004/1732(+,+)  | 3004→1732       |

<sup>a</sup> The first symbol in the brackets represented symbol in synchronous spectrum, and the second symbol in the brackets represented symbol in asynchronous spectrum

<sup>b</sup> “→” meant “prior to” and “,” meant “simultaneously”

### 3. 2D correlation analysis of pure PMPCS system in 100~140 °C

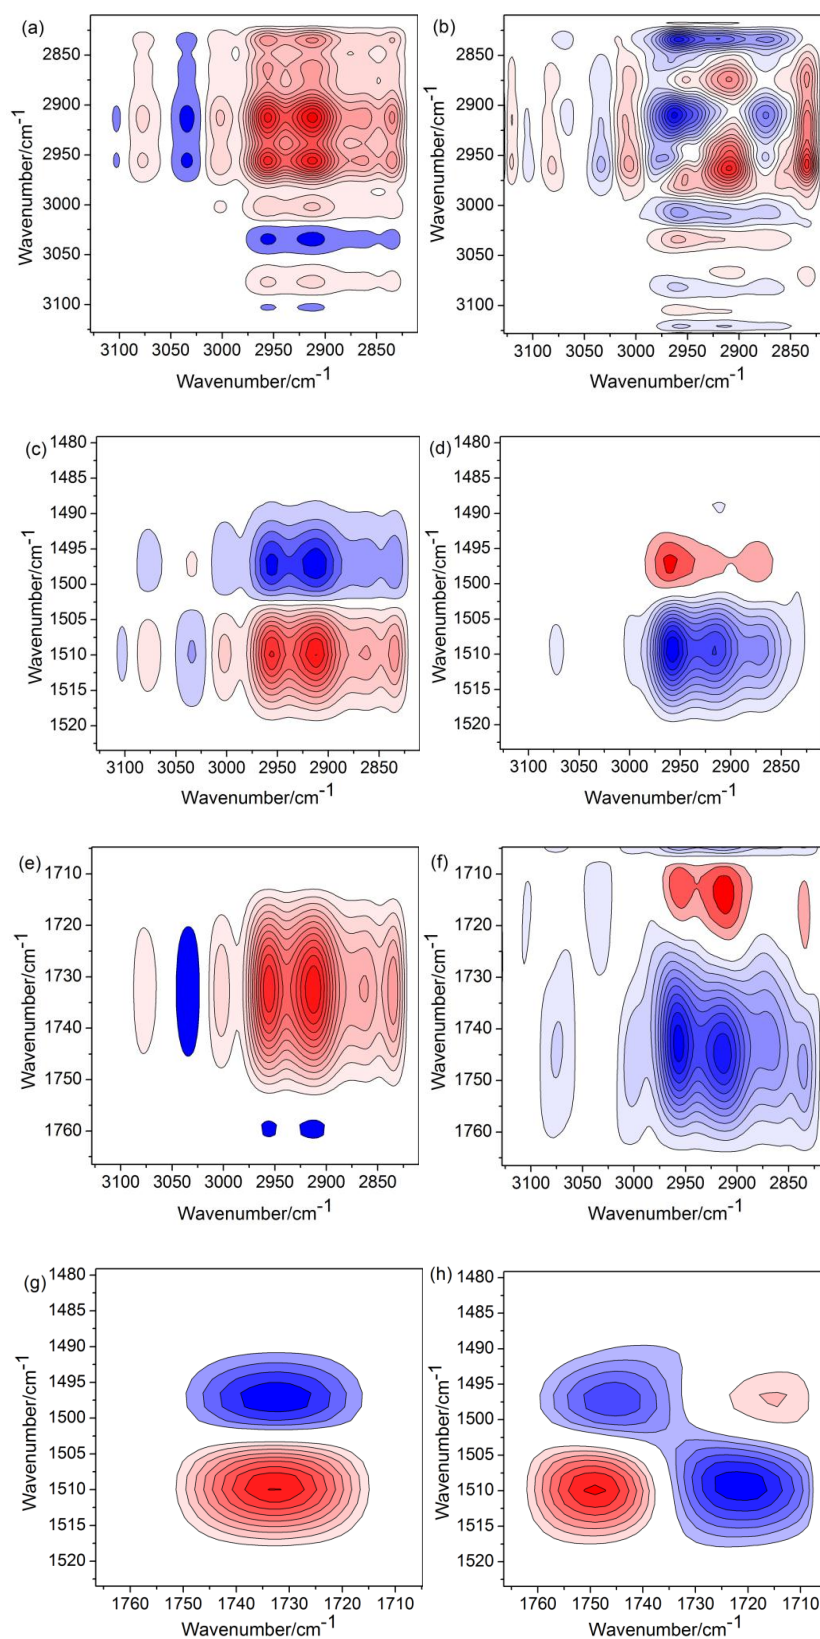

Fig. S2. 2D synchronous spectra of (a) C-H stretching vibration region 3127-2811 cm<sup>-1</sup>; (c) C-H stretching vibration region 3127-2811 cm<sup>-1</sup> with skeleton vibration of aromatic ring II 1540-1474 cm<sup>-1</sup>; (e) C-H stretching vibration region 3127-2811 cm<sup>-1</sup> and carbonyl stretching vibration of

1766-1706  $\text{cm}^{-1}$ ; (g) carbonyl stretching vibration of 1766-1706  $\text{cm}^{-1}$  and skeleton vibration of aromatic ring II 1540-1474  $\text{cm}^{-1}$  and 2D asynchronous spectra of (b) C-H stretching vibration region 3127-2811  $\text{cm}^{-1}$ ; (d) C-H stretching vibration region 3127-2811  $\text{cm}^{-1}$  with skeleton vibration of aromatic ring II 1540-1474  $\text{cm}^{-1}$ ; (f) C-H stretching vibration region 3127-2811  $\text{cm}^{-1}$  and carbonyl stretching vibration of 1766-1706  $\text{cm}^{-1}$ ; (h) carbonyl stretching vibration of 1766-1706  $\text{cm}^{-1}$  and skeleton vibration of aromatic ring II 1540-1474  $\text{cm}^{-1}$ .

Table S2. Symbols of the cross-peaks in synchronous and asynchronous spectra of the three representative spectral regions of pure PMPCS system in 100~140 °C

| Cross-peak                   | Variation order        | Cross-peak      | Variation order |
|------------------------------|------------------------|-----------------|-----------------|
| 2910/1508 (+,-) <sup>a</sup> | 1508→2910 <sup>b</sup> | 2910/1732(+,-)  | 1732→2910       |
| 3004/1508(+,-)               | 1508→3004              | 3004/1732(+,-)  | 1732→3004       |
| 3080/1508 (+,-)              | 1508→3080              | 3080/1732(+,-)  | 1732→3080       |
| 1732/1508(+,-)               | 1508→1732              | 3032/2910 (-,-) | 3032→2910       |
| 3004/2910(+,+)               | 3004→2910              | 3080/2910 (+,+) | 3080→2910       |
| 3080/3004(+,0)               | 3004,3080              | 3032/3004(-,-)  | 3032→3004       |
| 3032/1508 (-,+)              | 1508→3032              | 3032/1732(-,+)  | 1732→3032       |

<sup>a</sup> The first symbol in the brackets represented symbol in synchronous spectrum, and the second symbol in the brackets represented symbol in asynchronous spectrum

<sup>b</sup> “→” meant “prior to” and “,” meant “simultaneously”

#### 4. 2D correlation analysis of PMPCS/GO-PMPCS system in 140~180 °C

Table S3. Symbols of the cross-peaks in synchronous and asynchronous spectra of the three representative spectral regions of PMPCS/GO-PMPCS system in 140~180 °C

| Cross-peak     | Variation order | Cross-peak     | Variation order |
|----------------|-----------------|----------------|-----------------|
| 3004/2958(+,-) | 2958→3004       | 3080/2875(+,-) | 2875→3080       |
| 3004/2910(+,-) | 2910→3004       | 2910/2875(+,-) | 2875→2910       |
| 3004/2875(+,-) | 2875→3004       | 2958/2875(+,-) | 2875→2958       |
| 3080/2958(+,-) | 2958→3080       | 3080/3004(+,0) | 3080,3004       |
| 3080/2910(+,-) | 2910→3080       | 2910/1508(+,+) | 2910→1508       |
| 2958/2910(+,+) | 2958→2910       | 2958/1508(+,+) | 2958→1508       |
| 3004/1508(+,+) | 3004→1508       | 3080/1508(+,+) | 3080→1508       |
| 2910/1732(+,+) | 2910→1732       | 2958/1732(+,+) | 2958→1732       |
| 3004/1732(+,+) | 3004→1732       | 3080/1732(+,+) | 3080→1732       |

<sup>a</sup> The first symbol in the brackets represented symbol in synchronous spectrum, and the second symbol in the brackets represented symbol in asynchronous spectrum

<sup>b</sup> “→” meant “prior to” and “,” meant “simultaneously”

#### 5. 2D correlation analysis of pure PMPCS system in 140~180 °C

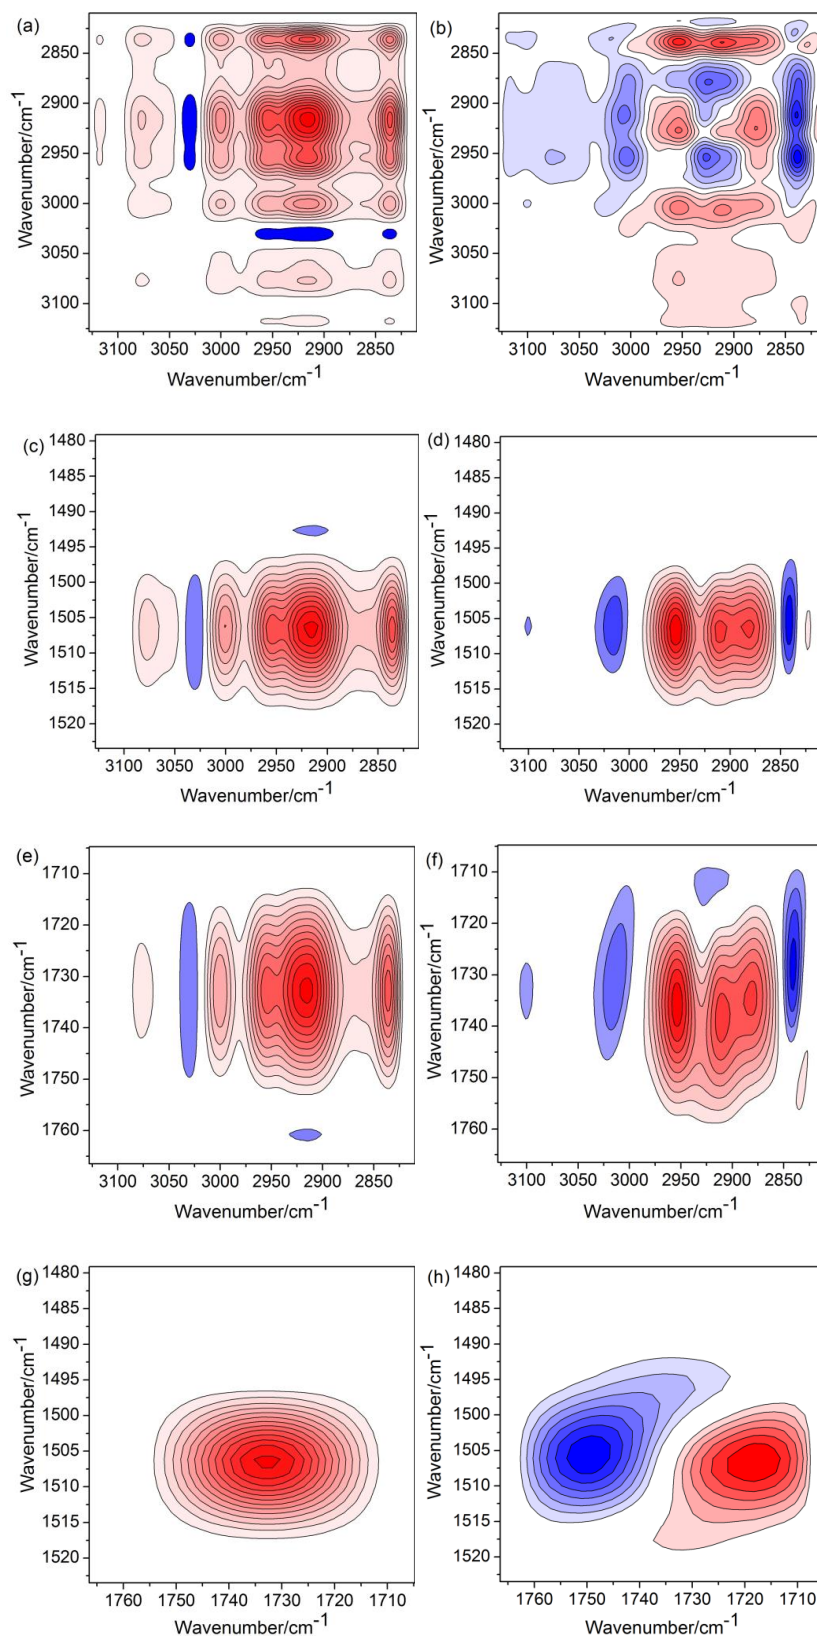

Fig. S3. 2D synchronous spectra of (a) C-H stretching vibration region 3127-2811 cm<sup>-1</sup>; (c) C-H stretching vibration region 3127-2811 cm<sup>-1</sup> with skeleton vibration of aromatic ring II 1540-1474 cm<sup>-1</sup>; (e) C-H stretching vibration region 3127-2811 cm<sup>-1</sup> and carbonyl stretching vibration of 1766-1706 cm<sup>-1</sup>; (g) carbonyl stretching vibration of 1766-1706 cm<sup>-1</sup> and skeleton vibration of

aromatic ring II 1540-1474  $\text{cm}^{-1}$  and asynchronous spectra of (b) C-H stretching vibration region 3127-2811  $\text{cm}^{-1}$ ; (d) C-H stretching vibration region 3127-2811  $\text{cm}^{-1}$  with skeleton vibration of aromatic ring II 1540-1474  $\text{cm}^{-1}$ ; (f) C-H stretching vibration region 3127-2811  $\text{cm}^{-1}$  and carbonyl stretching vibration of 1766-1706  $\text{cm}^{-1}$ ; (h) carbonyl stretching vibration of 1766-1706  $\text{cm}^{-1}$  and skeleton vibration of aromatic ring II 1540-1474  $\text{cm}^{-1}$ .

Table S4. Symbols of the cross-peaks in synchronous and asynchronous spectra of the three representative spectral regions of pure PMPCS system in 140~180 °C

| Cross-peak     | Variation order | Cross-peak      | Variation order |
|----------------|-----------------|-----------------|-----------------|
| 2910/2835(+,+) | 2910→2835       | 3080/2835 (+,0) | 3080,2835       |
| 3004/2910(+,-) | 2910→3004       | 2925/2835 (+,+) | 2925→2835       |
| 3080/2910(+,-) | 2910→3080       | 2925/2910 (+,-) | 2910→2925       |
| 3080/3004(+,0) | 3080,3004       | 3080/2925 (+,-) | 2925→3080       |
| 2835/1508(+,-) | 1508→2835       | 3004/2925 (+,-) | 2925→3004       |
| 2910/1508(+,+) | 2910→1508       | 2835/1732 (+,-) | 1732→2835       |
| 3004/1508(+,-) | 1508→3004       | 2910/1732 (+,+) | 2910→1732       |
| 3080/1508(+,-) | 1508→3004       | 3004/1732 (+,-) | 1732→3004       |
| 2925/1508(+,+) | 2925→1508       | 3080/1732 (+,-) | 1732→3080       |
| 2925/1732(+,+) | 2925→1732       | 1732/1508 (+,+) | 1732→1508       |

<sup>a</sup> The first symbol in the brackets represented symbol in synchronous spectrum, and the second symbol in the brackets represented symbol in asynchronous spectrum

<sup>b</sup> “→” meant “prior to” and “,” meant “simultaneously”
